# Supplementary material
Source: ML conference proceedings conference paper supplement (https://proceedings.neurips.cc/paper_files/paper/2019/hash/20c86a628232a67e7bd46f76fba7ce12-Abstract.html)
Supplement: Supplementary file [file 20c86a628232a67e7bd46f76fba7ce12-Supplemental.zip]

## Appendix: MaCow: Masked Convolutional Generative Flow

### A Dequantization

As described in §2, generative flows are defined on continuous random variables. Many real-world datasets, however, are recordings of discrete representations of signals, and fitting a continuous density model to discrete data produces a degenerate solution that places all probability mass on discrete datapoints (Uria et al., 2013; Ho et al., 2019). A common solution to this problem is “dequantization” that converts the discrete data distribution into a continuous one.

Specifically, in the context of natural images, each dimension (pixel) of the discrete data  $x$  takes on values in  $\{0, 1, \dots, 255\}$ . The dequantization process adds continuous random noise  $u$  to  $x$ , resulting a continuous data point of:

$$y = x + u, \quad (1)$$

where  $u \in [0, 1)^d$  is continuous random noise taking values from interval  $[0, 1)$ . By modeling the density of  $Y \in \mathcal{Y}$  with  $p_\theta(y)$ , the distribution of  $X$  is defined as:

$$P_\theta(x) = \int_{\mathcal{Y}} p_\theta(y) dy = \int_{[0,1)^d} p_\theta(x + u) du. \quad (2)$$

By restricting the range of  $u$  in  $[0, 1)$ , the mapping between  $y$  and a pair of  $x$  and  $u$  is bijective. Thus, we have  $p_\theta(y) = p_\theta(x + u) = p_\theta(x, u)$ .

By introducing a *dequantization noise distribution*  $q(u|x)$ , the training objective in (1) can be re-written as:

$$\begin{aligned} \mathbb{E}_{P(X)} \left[ -\log P_\theta(X) \right] &= \mathbb{E}_{P(X)} \left[ -\log \int_{[0,1)^d} p_\theta(X, u) du \right] \\ &= \mathbb{E}_{P(X)} \left[ \mathbb{E}_{q(u|X)} \left[ -\log \frac{p_\theta(X, u)}{q(u|X)} \right] - \text{KL}(q(u|X) || p_\theta(u|X)) \right] \\ &\leq \mathbb{E}_{P(X)} \left[ \mathbb{E}_{q(u|X)} \left[ -\log p_\theta(X, u) \right] + \mathbb{E}_{q(u|X)} \left[ \log q(u|X) \right] \right] \\ &= \mathbb{E}_{p(Y)} \left[ -\log p_\theta(Y) \right] + \mathbb{E}_{P(X)} \mathbb{E}_{q(u|X)} \left[ \log q(u|X) \right], \end{aligned} \quad (3)$$

where  $p(y) = P(x)q(u|x)$  is the distribution of the dequantized variable  $Y$  under the dequantization noise distribution  $q(u|X)$ .

**Uniform Dequantization.** The most common dequantization method in prior work is uniform dequantization where the noise  $u$  is sampled from the uniform distribution  $\text{Unif}(0, 1)$  such that

$$q(u|x) \sim \text{Unif}(0, 1), \forall x \in \mathcal{X}.$$

From (3), we have

$$\mathbb{E}_{P(X)} \left[ -\log P_\theta(X) \right] \leq \mathbb{E}_{p(Y)} \left[ -\log p_\theta(Y) \right],$$

as  $\log q(u|x) = 0, \forall x \in \mathcal{X}$ .

**Variational Dequantization.** As discussed in Ho et al. (2019), uniform dequantization directs  $p_\theta(y)$  to assign uniform density to unit hypercubes  $[0, 1)^d$ , which is difficult for smooth distribution approximators. They proposed a parametric dequantization noise distribution  $q_\phi(u|x)$  with a training objective to optimize the *evidence lower bound* (ELBO) provided in (3):

$$\min_{\theta, \phi} \mathbb{E}_{p_\phi(Y)} \left[ -\log p_\theta(Y) \right] + \mathbb{E}_{P(X)} \mathbb{E}_{q_\phi(u|X)} \left[ \log q_\phi(u|X) \right], \quad (4)$$

where  $p_\phi(y) = P(x)q_\phi(u|x)$ . In this paper, we implemented both these two dequantization methods for our MACOW, as is detailed in §4).

## B Experimental Details

### B.1 Model details

Table 4: Hyper-parameters for MACOW in our experiments.

| DataSet   | Dequant | Batch Size | Levels | Depths per Level                                    | # Param | # Param Glow |
|-----------|---------|------------|--------|-----------------------------------------------------|---------|--------------|
| CIFAR-10  | Unif    | 512        | 3      | $[[12, 12], [12, 12], 12]$                          | 41.2M   | 44.2M        |
|           | Var     | 512        | 3      | $[[12, 12], [12, 12], 12]$                          | 43.5M   |              |
| ImageNet  | Unif    | 160        | 4      | $[[16, 16], [16, 16], [12, 12], 12]$                | 117.2M  | 111.6M       |
|           | Var     | 160        | 4      | $[[16, 16], [16, 16], [12, 12], 12]$                | 122.5M  |              |
| LSUN      | Unif    | 160        | 5      | $[[32, 32], [32, 32], [16, 16], [12, 12], 6]$       | 166.6M  | 198.1M       |
|           | Var     | 160        | 5      | $[[32, 32], [32, 32], [16, 16], [12, 12], 6]$       | 171.9M  |              |
| CelebA-HQ | Unif    | 40         | 6      | $[[24, 24], [16, 16], [16, 16], [8, 8], [4, 4], 2]$ | 171.9M  | 170.8M       |
|           | Var     | 40         | 6      | $[[24, 24], [16, 16], [16, 16], [8, 8], [4, 4], 2]$ | 177.3M  |              |

### B.2 Optimization

Parameter optimization is performed with the Adam optimizer (Kingma and Ba, 2014) with  $\beta = (0.9, 0.999)$  and  $\epsilon = 1e - 8$ . Warmup training is applied to all the experiments: the learning rate linearly increases to for 500 updates to the initial learning rate  $1e - 3$ . Then we use exponential decay to decrease the learning rate with decay rate is 0.999997.

## C More samples from our experiments

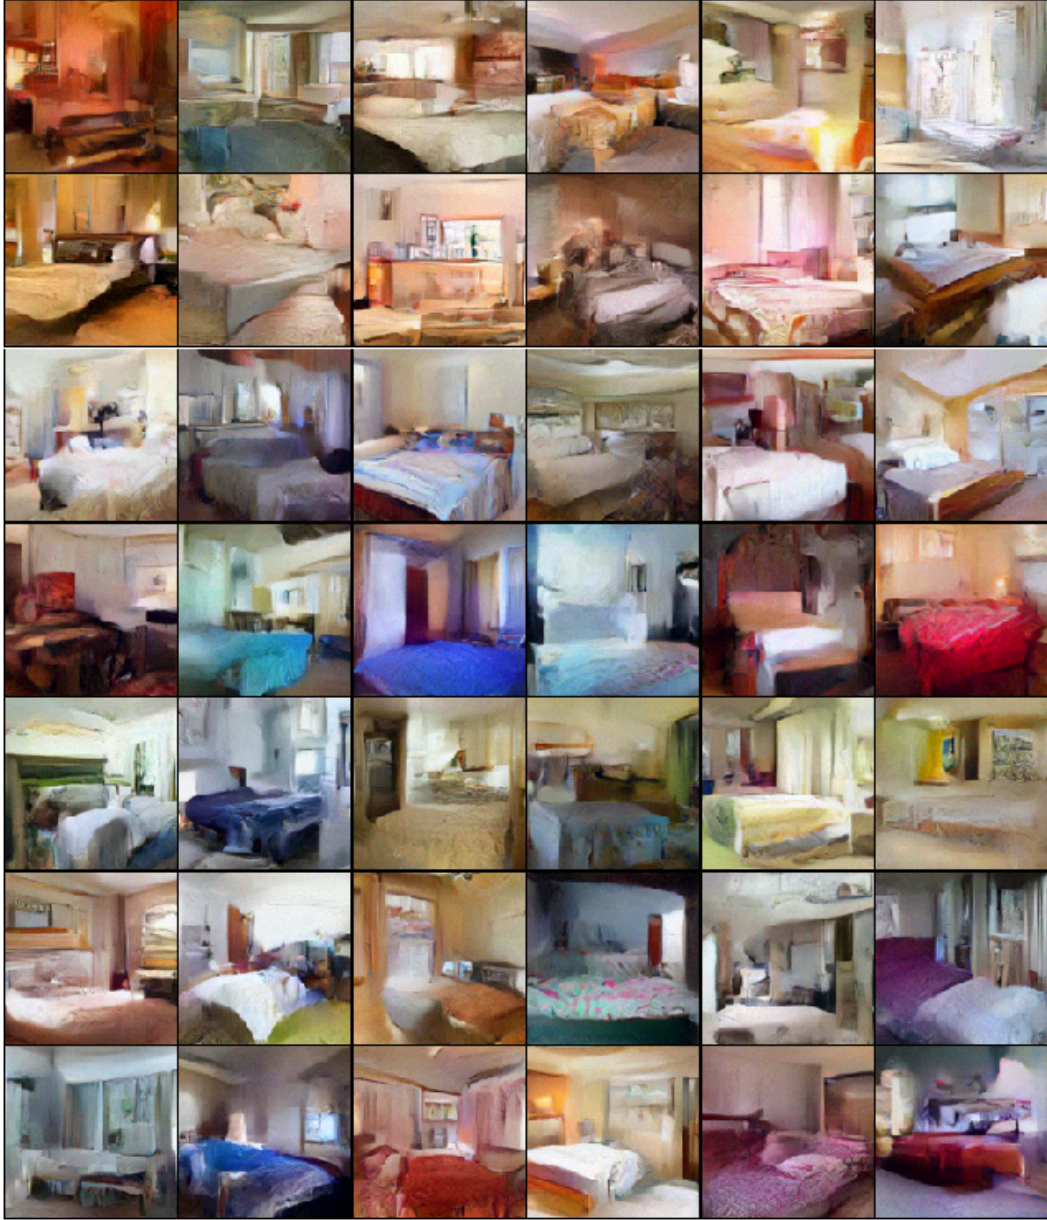

Figure 4: Samples from 5-bit,  $128 \times 128$  LSUN bedrooms.

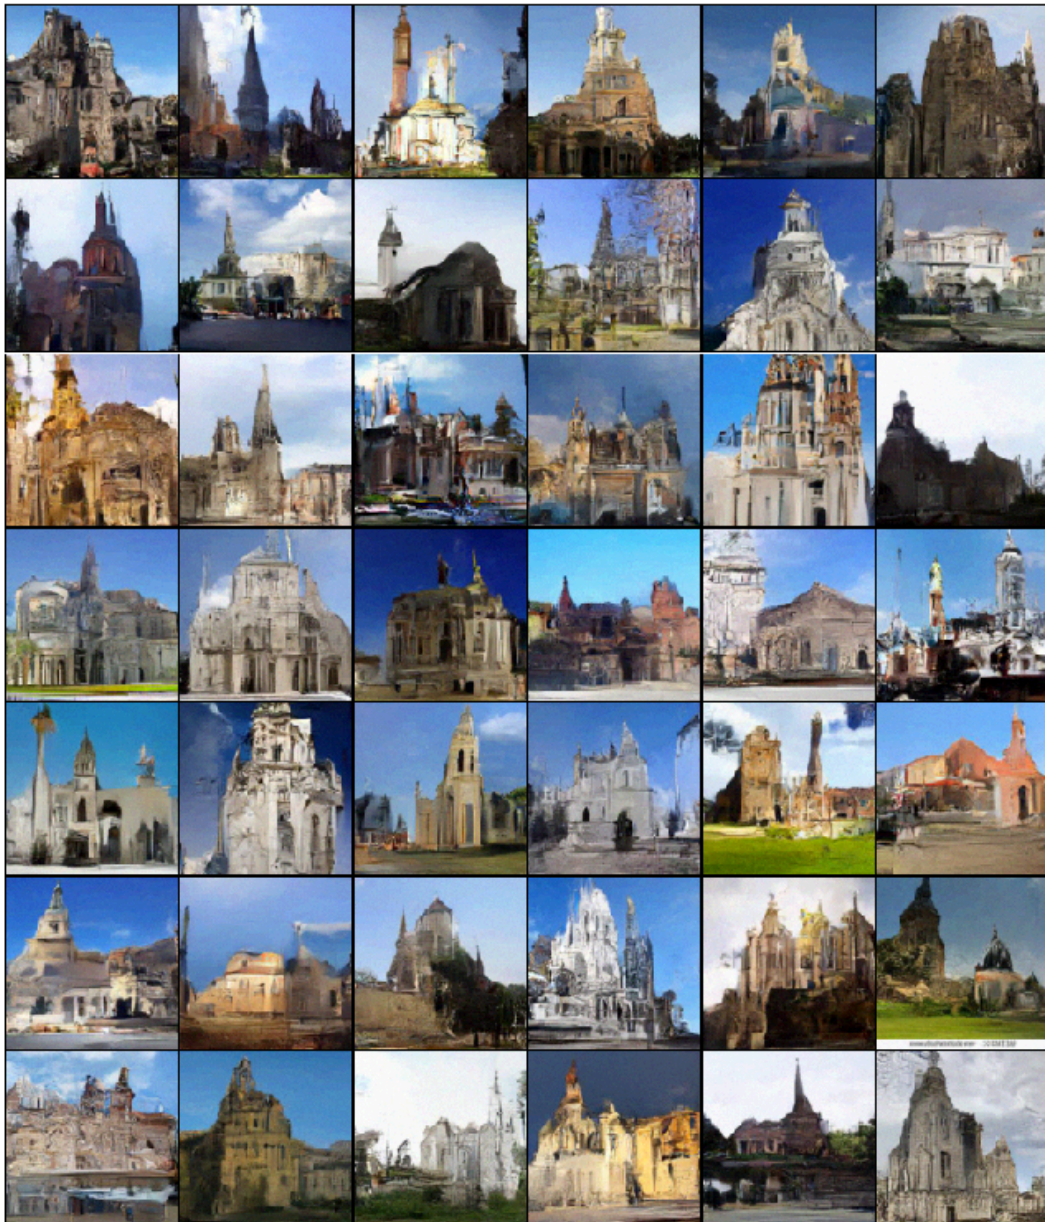

Figure 5: Samples from 5-bit,  $128 \times 128$  LSUN church.



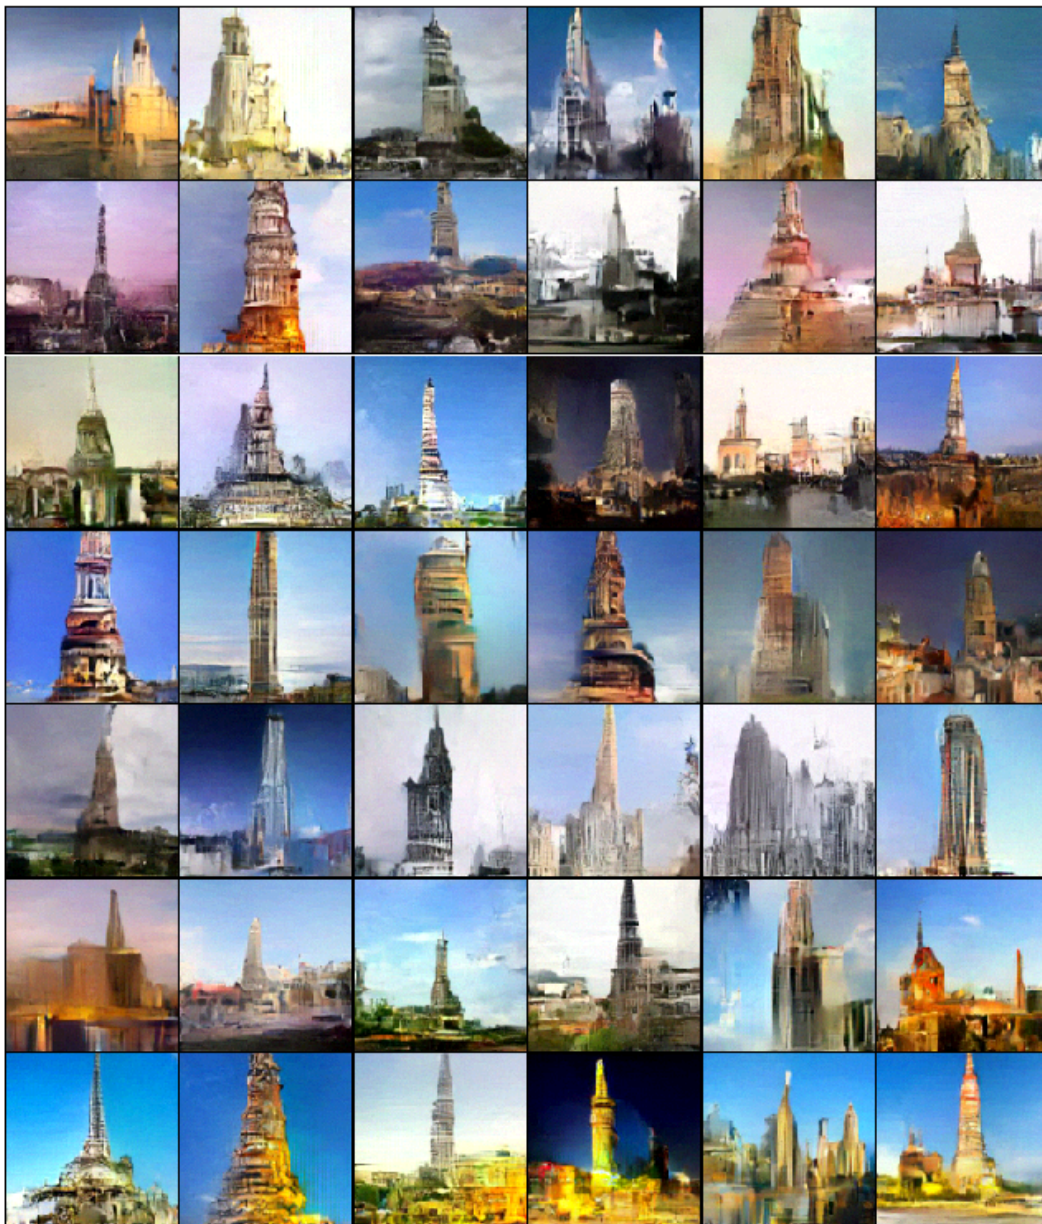

Figure 6: Samples from 5-bit,  $128 \times 128$  LSUN towers.

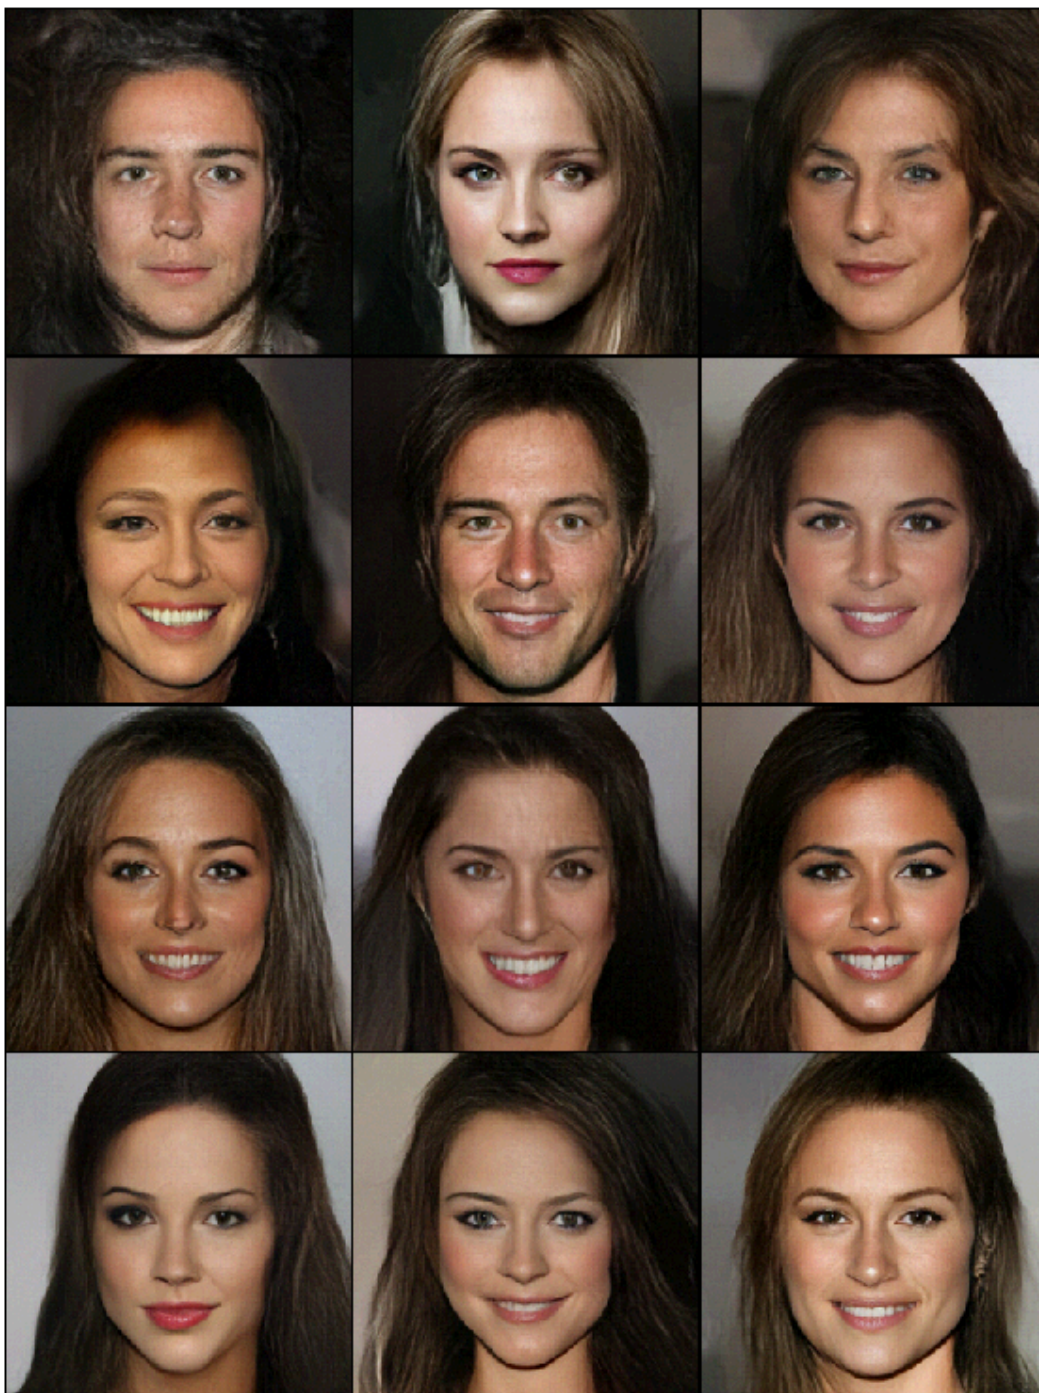

Figure 7: Synthetic celebrities sampled from 5-bit  $256 \times 256$  CelebA-HQ.



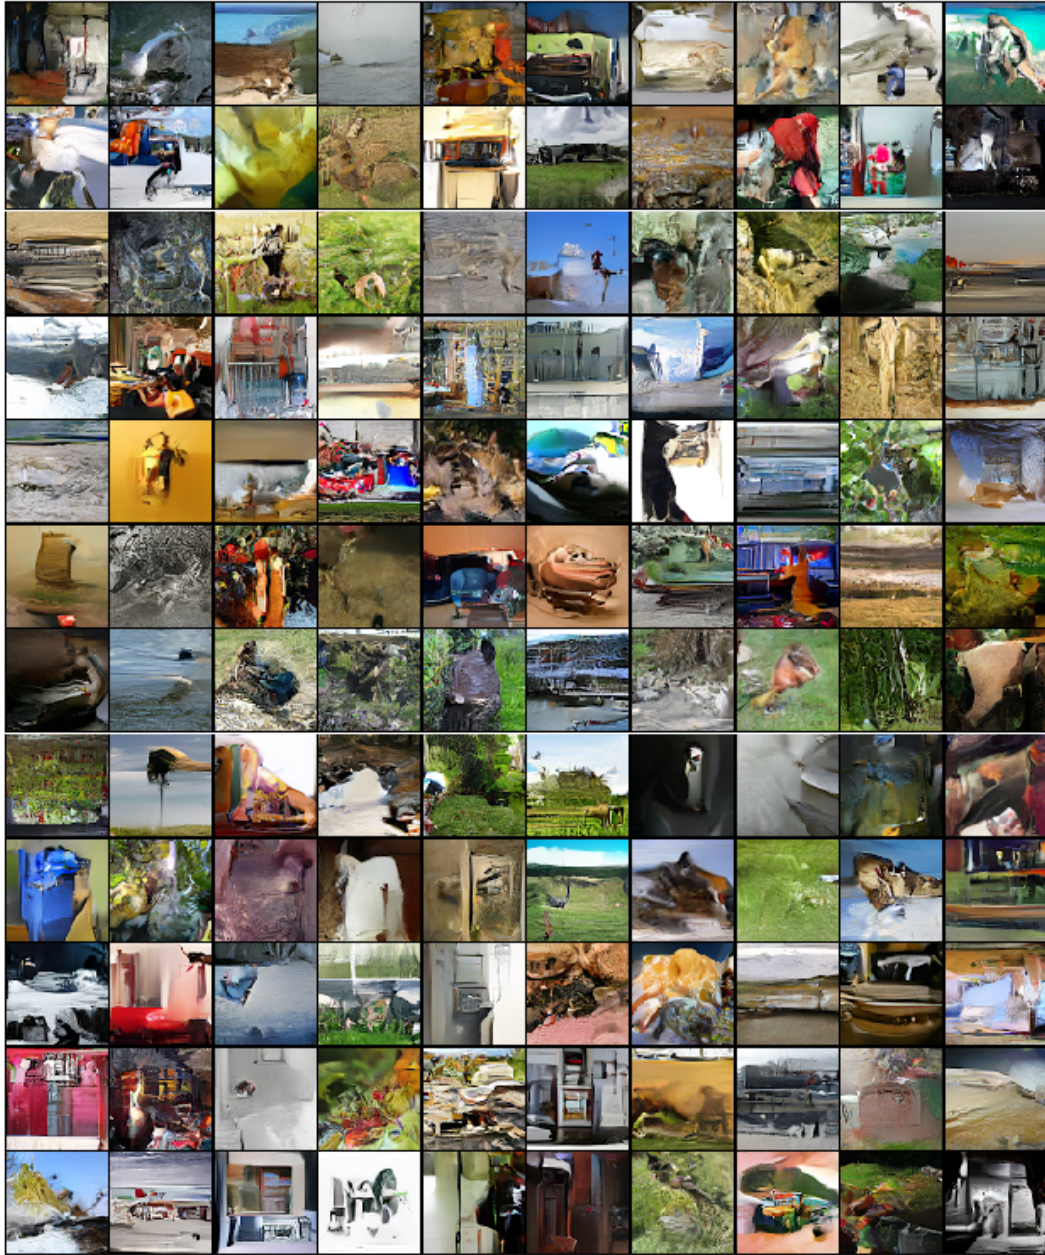

Figure 8: Samples from 8-bit imagenet  $64 \times 64$  with uniform dequantization



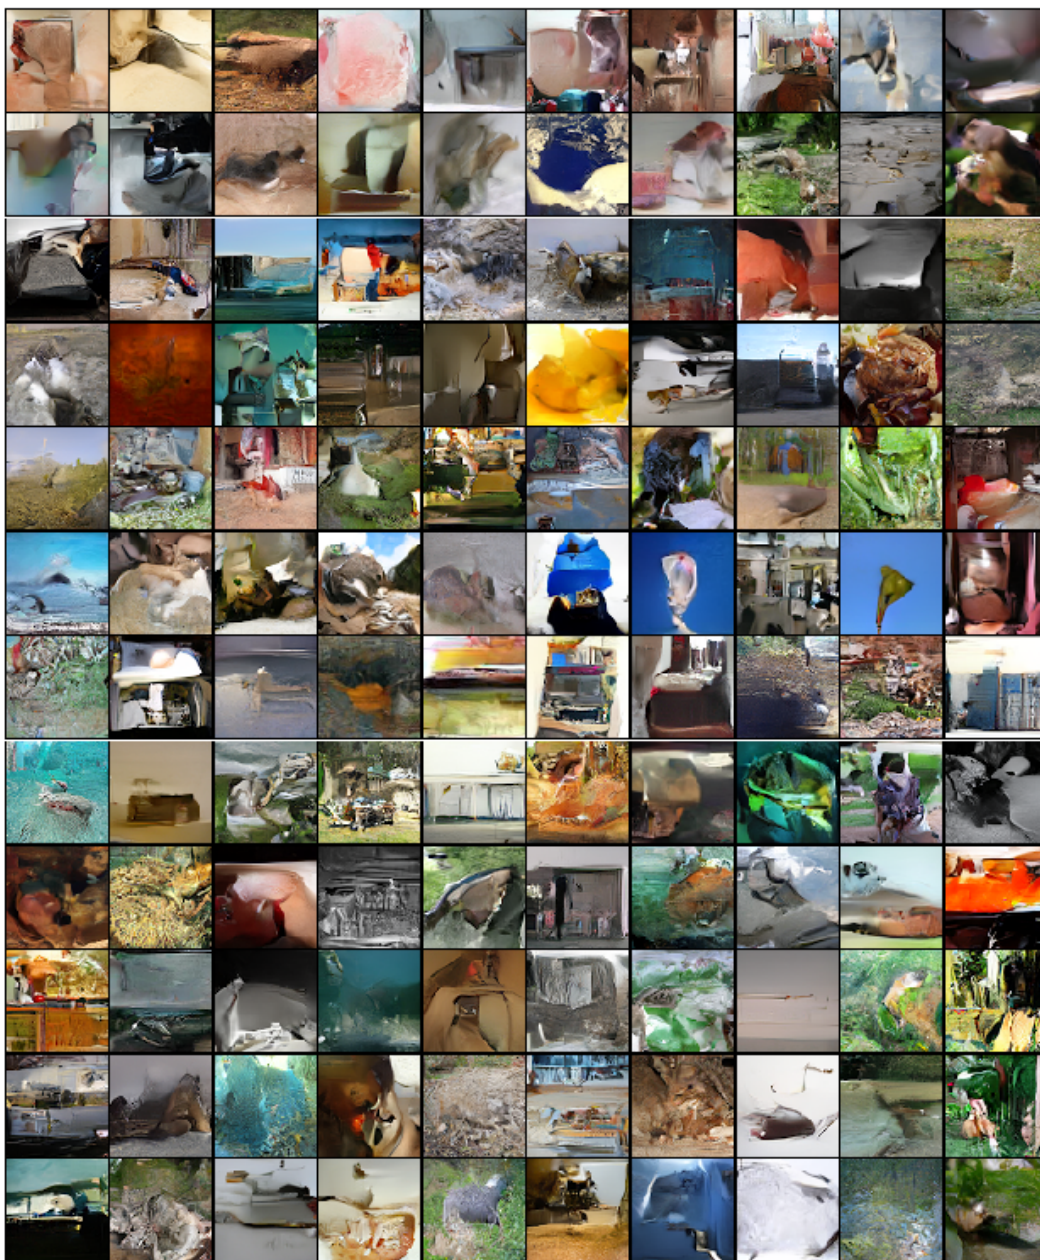

Figure 9: Samples from 8-bit imagenet  $64 \times 64$  with variational dequantization
